# Supplementary material
Source: PubMed Central journal article supplement (PMC7369145)
Supplement: NIHMS1569014-supplement-1.pdf [file NIHMS1569014-supplement-1.pdf]

**Table S1. Oligonucleotides, Related to STAR Methods: Key Resources Table**

| REAGENT or RESOURCE                                              | SOURCE     | IDENTIFIER  |
|------------------------------------------------------------------|------------|-------------|
| Oligonucleotides                                                 |            |             |
| ggtgacagcttggtgttatcggtttgaacg                                   | This Study | Mu_L213     |
| ggttcagccataccctaagtgatcccatg                                    | This Study | Mu_R137     |
| cgatcgactacacgcatttcgatcactgcacgccccgggggggggggggggg             | This Study | rand_polyG  |
| cgatcgactacacgcatttcgatcactgcacgccccgg                           | This Study | rand_seq    |
| gatattcgcgaggactgacgacgcttg                                      | This Study | muB_fwd     |
| cacggaaagcctgacgcagataatctctgt                                   | This Study | muB_rev     |
| ccgtattctcggcttaacctccatgaac                                     | This Study | hipA_fwd    |
| cttgatgaacaaccagcggtaggcg                                        | This Study | hipA_rev    |
| ccgggaggacattggattatcgggatctg                                    | This Study | Mu_L31      |
| tgccccgtacatcgttagaactactctaccatccacat                           | This Study | y_link      |
| atgtggatggtacgagtagtttaacgatgtacggggaca                          | This Study | y_link_rev  |
| cctggtgcaaaccgcactgcgtcagcaggagaagatcgaagtgtaggctgga<br>gctgcttc | This Study | mukBF       |
| cgctcaactggtgagactgtttgcgctgccagccaaacatgggaattagccat<br>ggtcc   | This Study | mukBR       |
| ccagcgctgatgatgcccgataagggcggcgtatgtctgatgtttacgcc               | This Study | Mu_parS_f   |
| ggaaaatcaacgtatcagtcggcgccctcggtgaattaatgggtgtggatc              | This Study | Mu_parS_r   |
| gcagcatctgagaatacaatctttcggtaaaggcggaat                          | This Study | pKD4_pheLf  |
| cagatcttggaatgcgctctattttgaaaaacc                                | This Study | pKD4_pheLr  |
| gtggctggtgcgcggtggaaggcagcacaaggcggaatttgccaataact<br>tgctcagt   | This Study | pheL_Bin10f |
| cagaagaagatagcgaagaggtgccccctgctgaattaatgggtgtggatc              | This Study | pheL_Bin10r |

|                                                               |            |             |
|---------------------------------------------------------------|------------|-------------|
| aaaagaaacgccataattctggaagttataaggcggaattgccaataactg<br>ctcagt | This Study | pheL_Bin30f |
| caccatcaatttatgactggattaagaaaggctgaattaatgggtgtggatc          | This Study | pheL_Bin30r |
