# Supplementary material
Source: PubMed Central journal article supplement (PMC7369145)

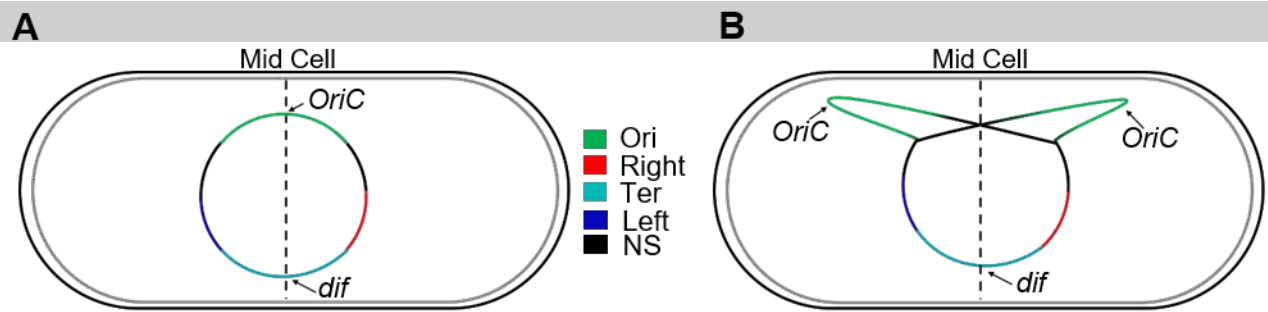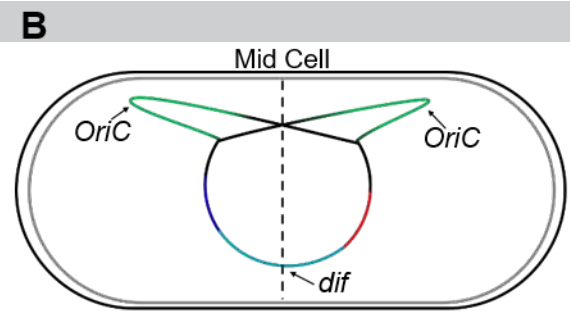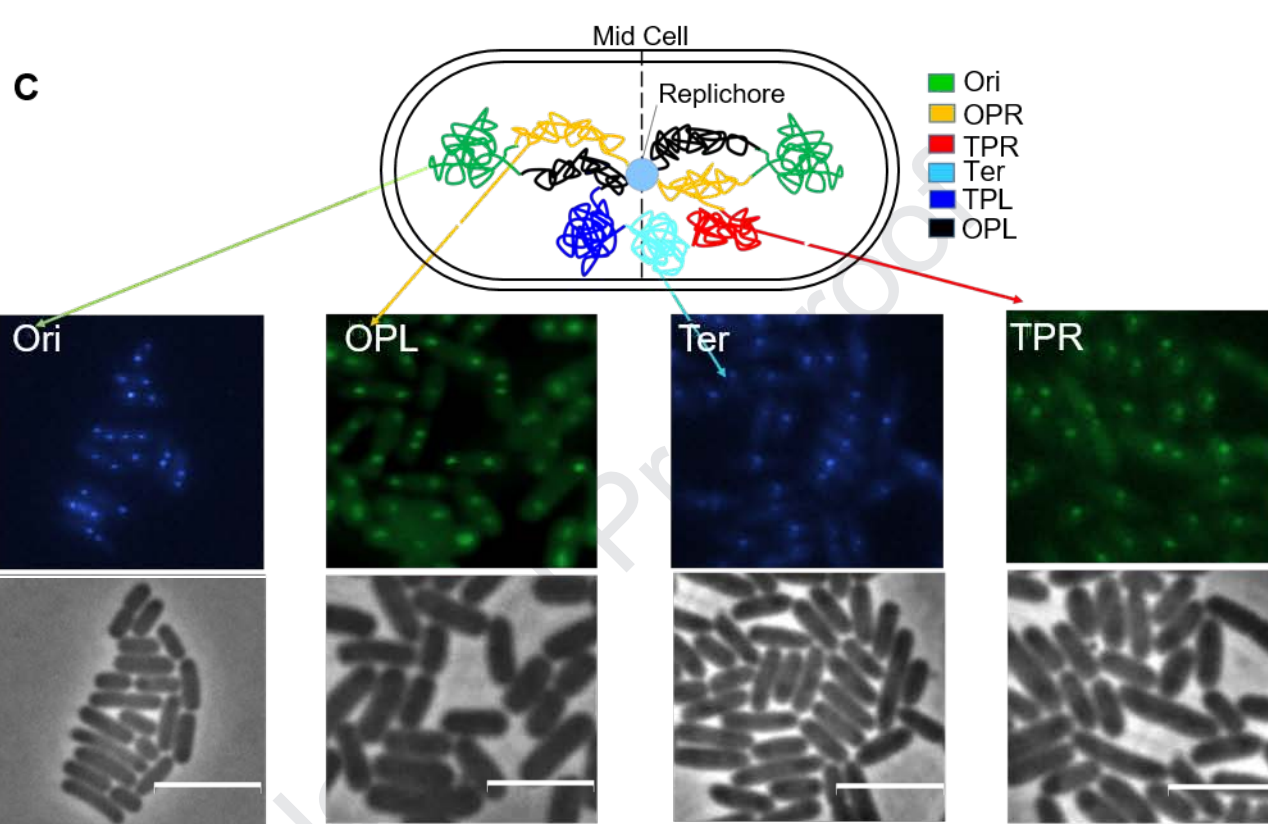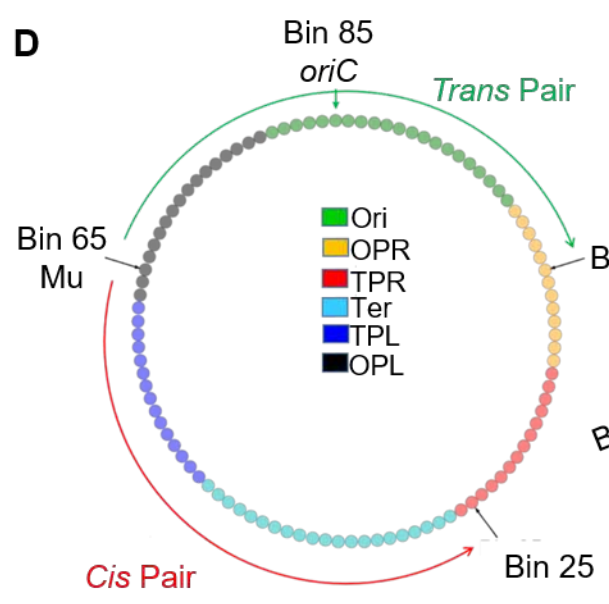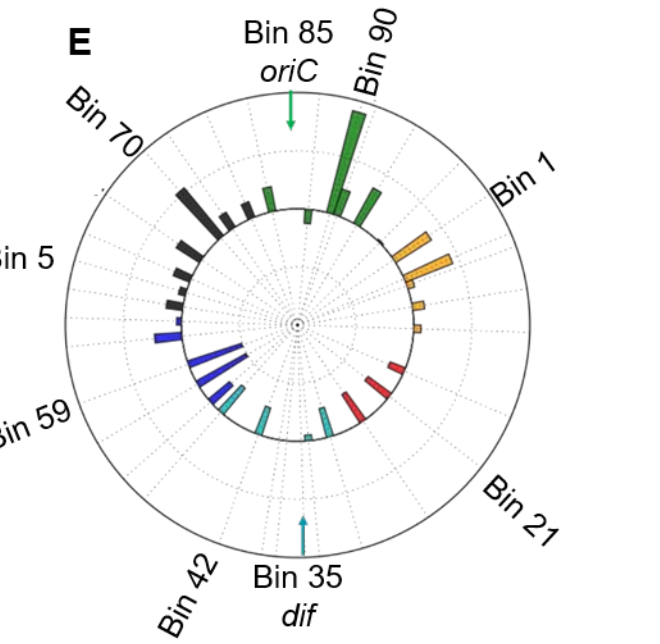

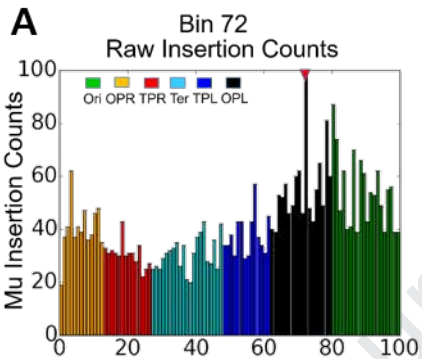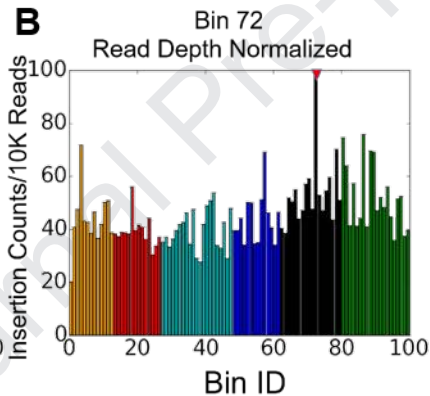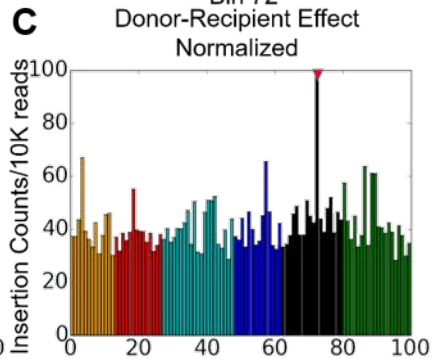

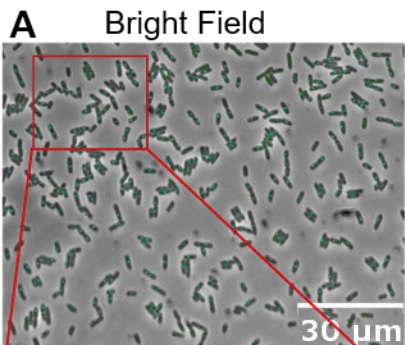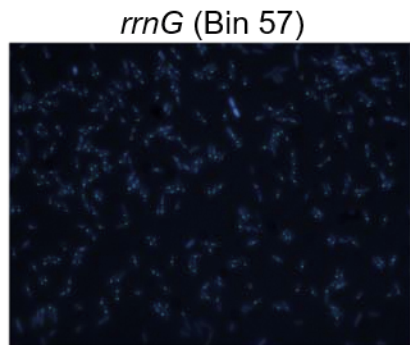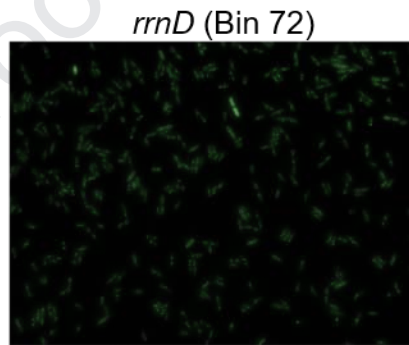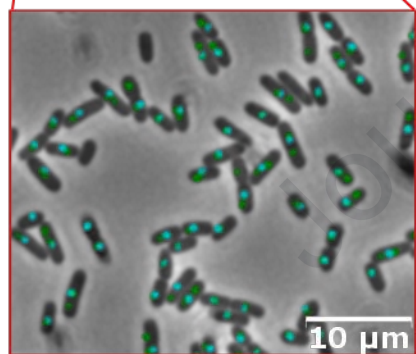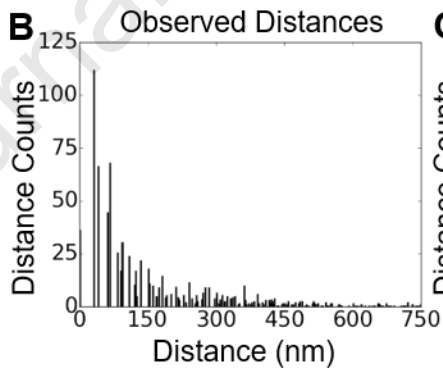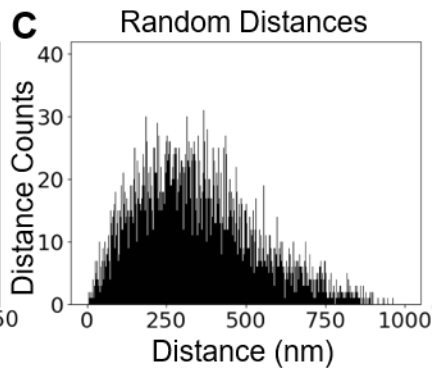

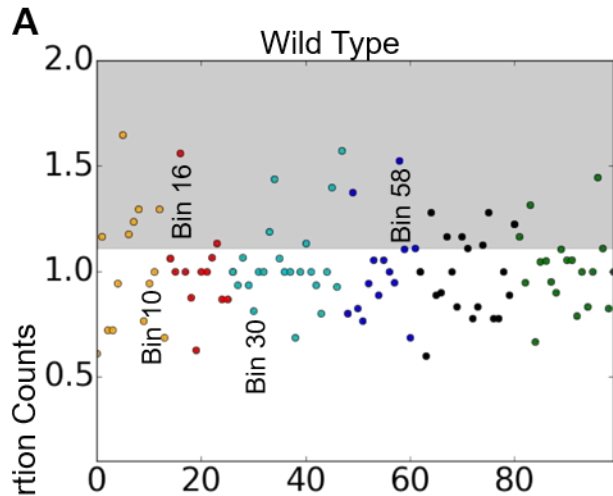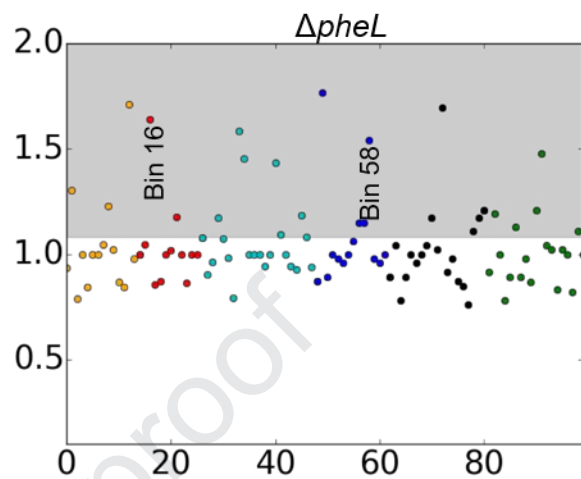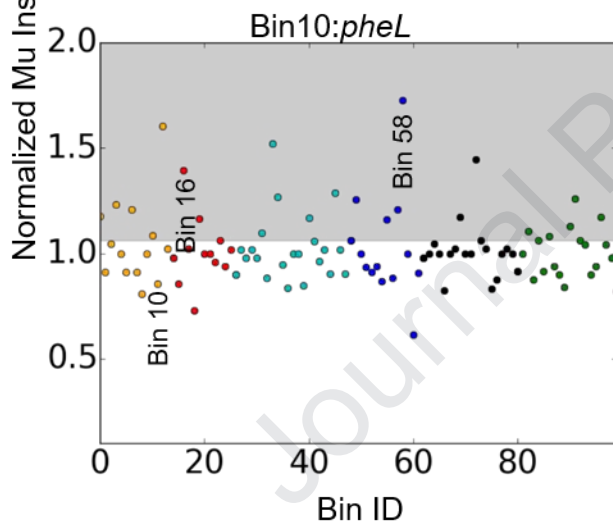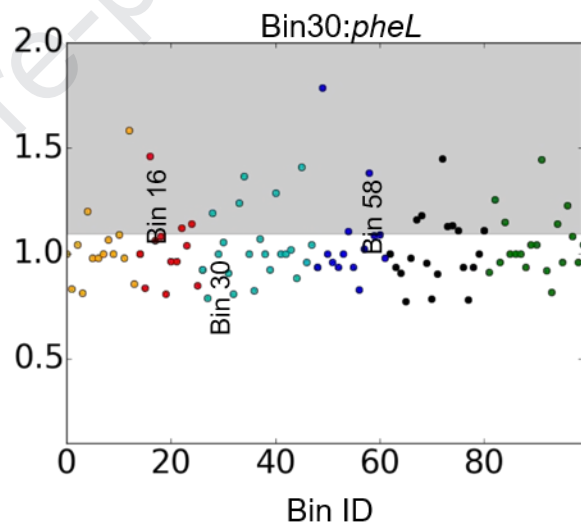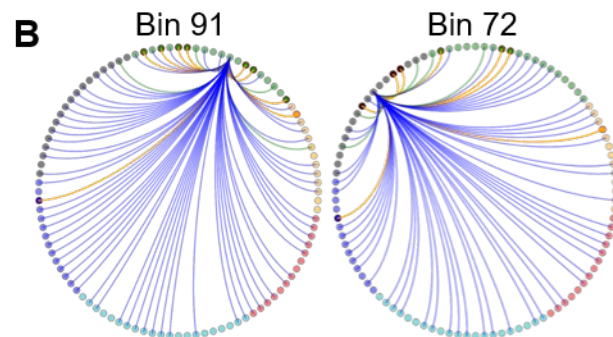

Journal Pre-proof

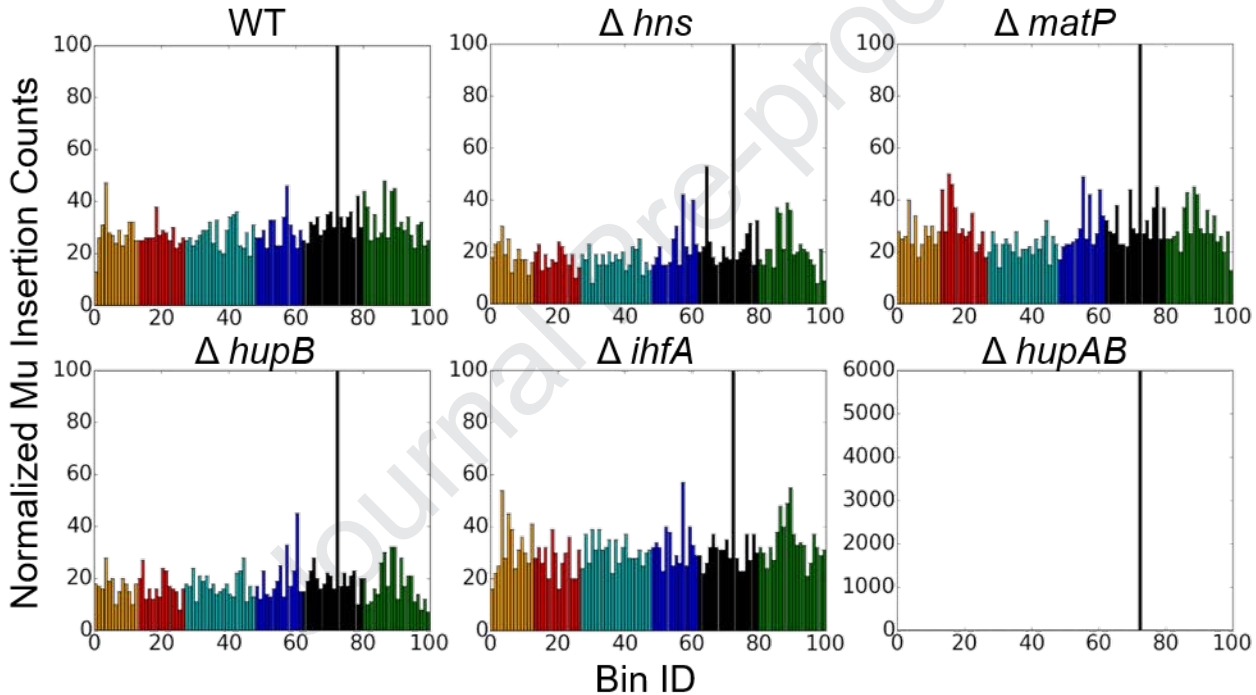

**A**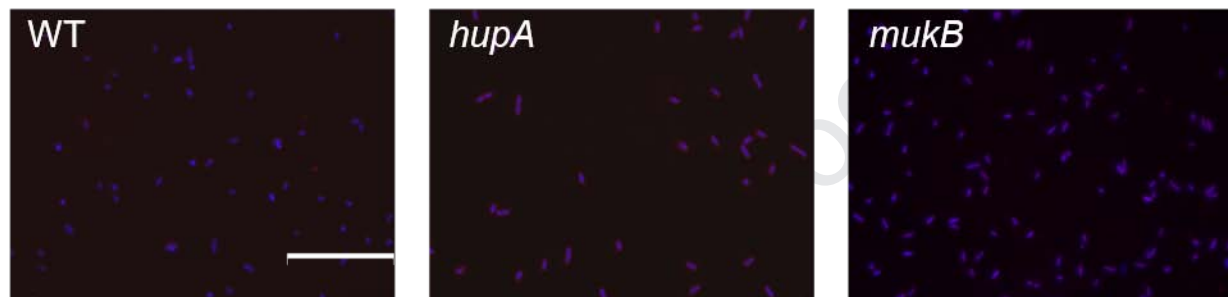**B**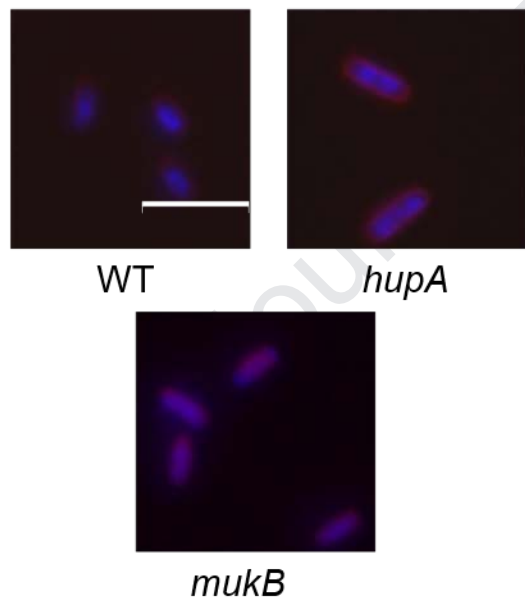**C**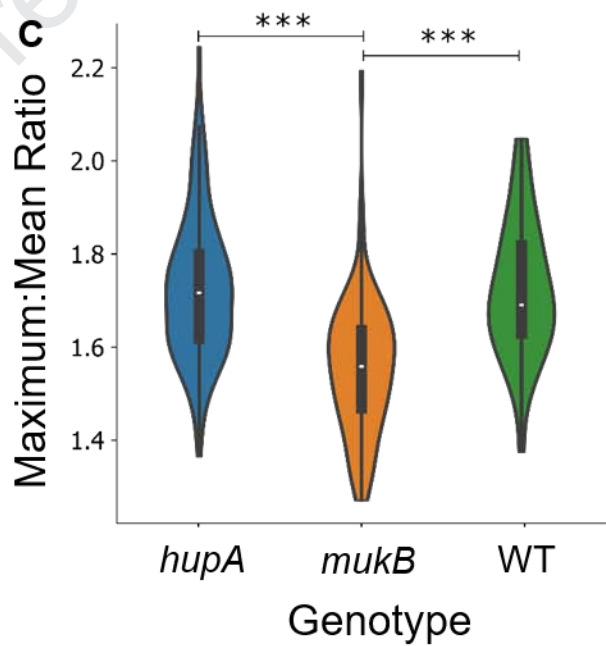

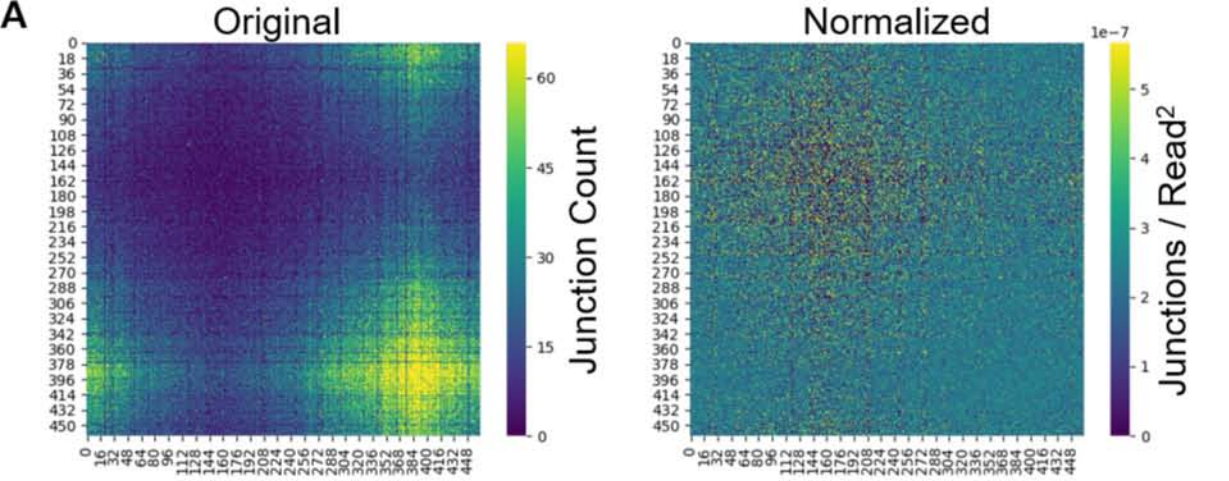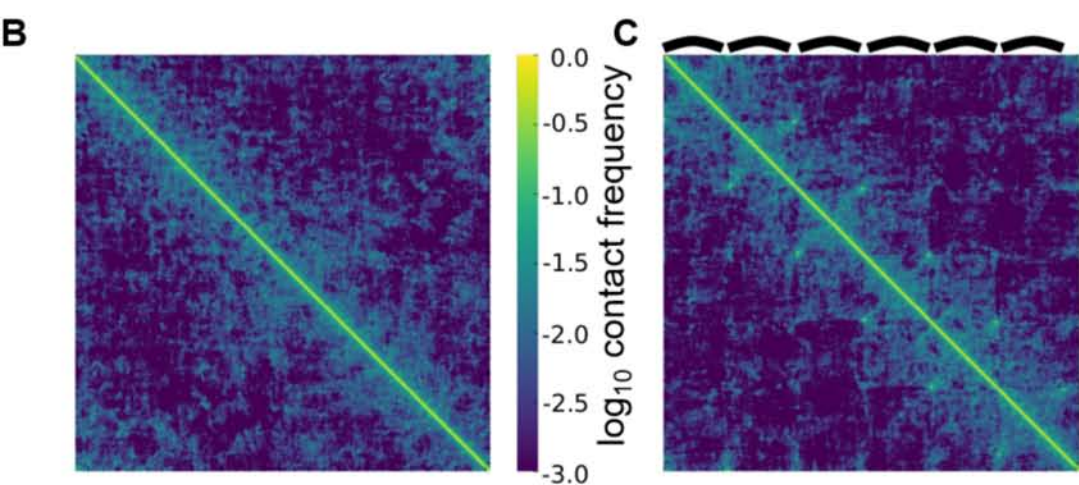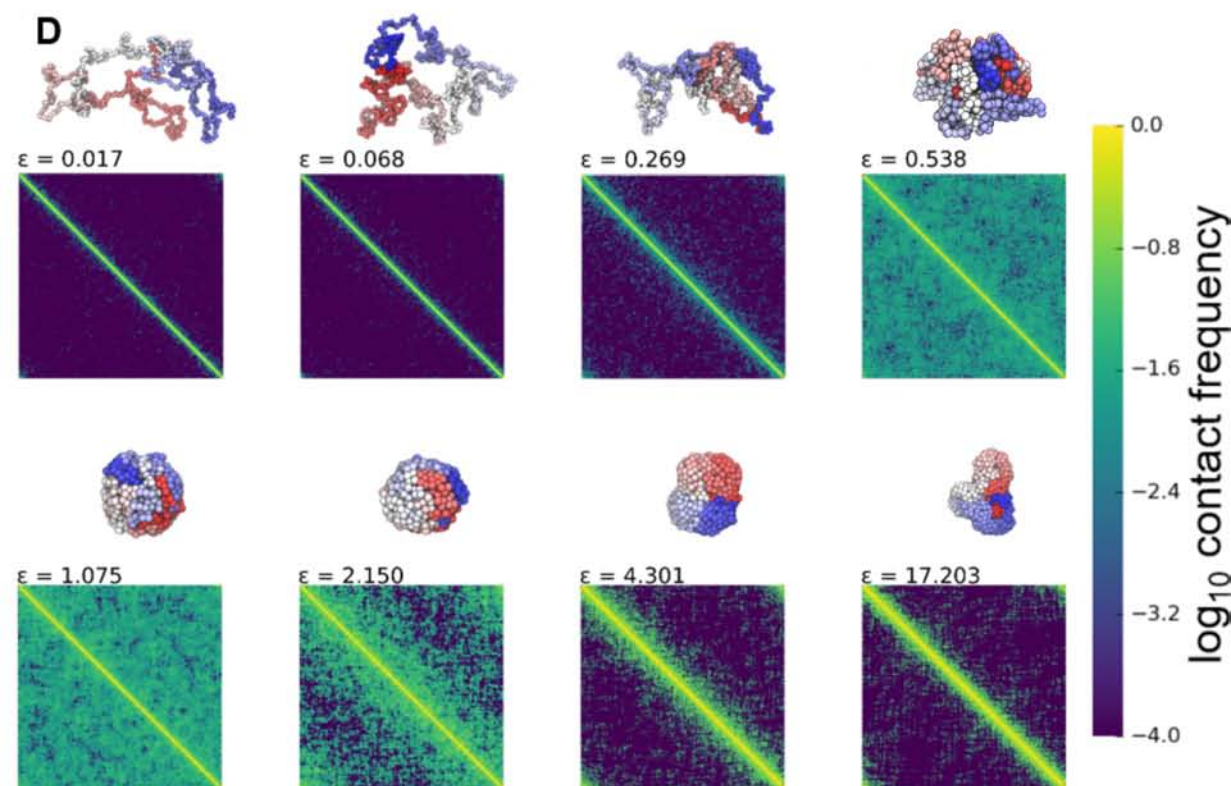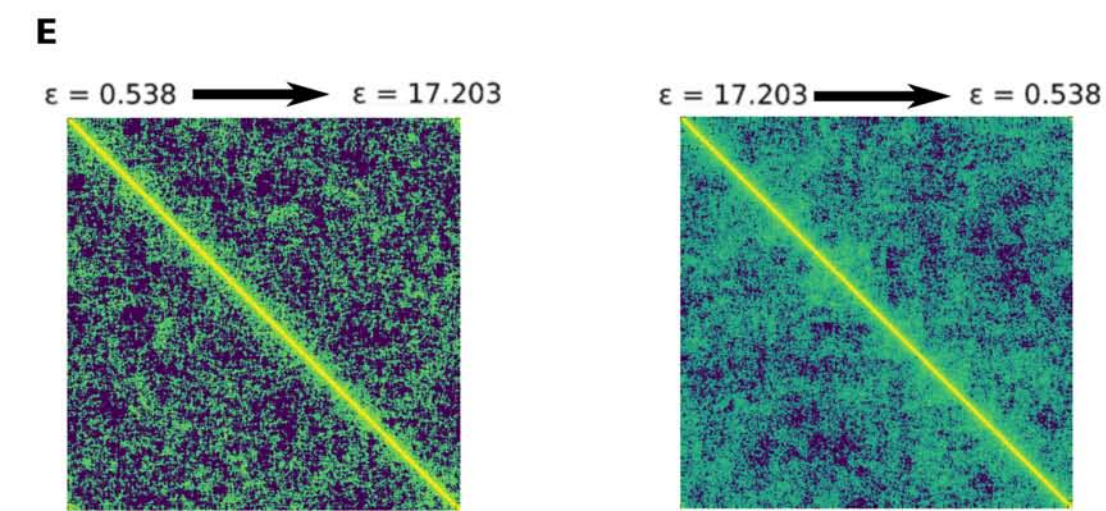

Supplement: NIHMS1569014-supplement-4.pdf [file NIHMS1569014-supplement-4.pdf]
